# Supplementary material
Source: PubMed Central journal article supplement (PMC11028119)
Supplement: 262_2019_2355_MOESM1_ESM.pdf [file 262_2019_2355_MOESM1_ESM.pdf]

**Supplementary Table 1. Clinicopathologic characteristics of three cohorts of patients with hepatocellular carcinoma**

|                       |          | Cohort 1<br>(224 cases) |      | Cohort 2<br>(380 cases) |      | Cohort 3<br>(461 cases) |      |
|-----------------------|----------|-------------------------|------|-------------------------|------|-------------------------|------|
|                       |          | N                       | %    | N                       | %    | N                       | %    |
| Age(year)             | ≤50      | 95                      | 42.4 | 150                     | 39.5 | 222                     | 48.2 |
|                       | >50      | 129                     | 57.6 | 230                     | 60.5 | 239                     | 51.8 |
| Sex                   | Female   | 25                      | 11.2 | 65                      | 17.1 | 71                      | 15.4 |
|                       | Male     | 199                     | 88.8 | 315                     | 82.9 | 390                     | 84.6 |
| HBsAg                 | Negative | 42                      | 18.8 | 54                      | 14.2 | 65                      | 14.1 |
|                       | Positive | 182                     | 81.2 | 326                     | 85.8 | 396                     | 85.9 |
| HCV                   | Negative | 222                     | 99.1 | 377                     | 99.2 | 457                     | 99.1 |
|                       | Positive | 2                       | 0.9  | 3                       | 0.8  | 4                       | 0.9  |
| AFP(ng/ml)            | ≤20      | 91                      | 40.6 | 145                     | 38.2 | 157                     | 34.1 |
|                       | >20      | 133                     | 59.4 | 235                     | 61.8 | 304                     | 65.9 |
| GGT(U/L)              | ≤54      | 83                      | 37.1 | 195                     | 51.3 | 207                     | 44.9 |
|                       | >54      | 141                     | 62.9 | 185                     | 48.7 | 254                     | 55.1 |
| Liver cirrhosis       | No       | 30                      | 13.4 | 61                      | 16.1 | 75                      | 16.3 |
|                       | yes      | 194                     | 86.6 | 319                     | 83.9 | 386                     | 83.7 |
| Tumor size(cm)        | ≤5       | 103                     | 46.0 | 232                     | 61.1 | 228                     | 49.5 |
|                       | >5       | 121                     | 54.0 | 148                     | 38.9 | 233                     | 50.5 |
| Tumor number          | Single   | 192                     | 85.7 | 337                     | 88.7 | 394                     | 85.5 |
|                       | Multiple | 32                      | 14.3 | 43                      | 11.3 | 67                      | 14.5 |
| Vascular invasion     | No       | 144                     | 64.3 | 261                     | 68.7 | 268                     | 58.1 |
|                       | Yes      | 80                      | 35.7 | 119                     | 31.3 | 193                     | 41.9 |
| Tumor encapsulation   | complete | 103                     | 46.0 | 211                     | 55.5 | 256                     | 55.5 |
|                       | none     | 121                     | 54.0 | 169                     | 44.5 | 205                     | 44.5 |
| Tumor differentiation | I+II     | 152                     | 67.9 | 285                     | 75.0 | 308                     | 66.8 |
|                       | III+IV   | 72                      | 32.1 | 95                      | 25.0 | 153                     | 33.2 |
| TNM stage             | I        | 124                     | 55.4 | 234                     | 61.6 | 236                     | 51.2 |
|                       | II+III   | 100                     | 44.6 | 146                     | 38.4 | 225                     | 48.8 |

Abbreviations: AFP, alpha-fetoprotein; GGT, gamma glutamyl transferase; TNM, tumor-node-metastasis.

**Supplementary Table 2. The distribution of plasmacytoid dendritic cells (pDCs) in the whole tumor sections of HCC (cohort 1, n=224).**

| Variable*          | Mean  | SE   | Range | <i>p</i> <sup>#</sup> |
|--------------------|-------|------|-------|-----------------------|
| BDCA2+ pDCs:       |       |      |       |                       |
| Intratumoral       | 8.86  | 0.84 | 0-127 |                       |
| Peritumoral stroma | 23.43 | 1.70 | 0-145 | <i>P</i> <0.001       |
| Nontumoral         | 38.64 | 2.50 | 0-221 | <i>P</i> <0.001       |

\* Number of BDCA2+ cells per mm<sup>2</sup>.

# Compared with intratumoral pDCs.

**Supplementary Table 3. Correlation between the ratio of intratumoral pDCs and/or pDCs of nontumor tissues and peritumor stromal tissues of whole tumor sections and clinicopathologic characteristics in HCC (cohort 1, n=224)**

| Clinicopathological indexes |          | Intratumoral pDCs/Peritumor stromal pDCs (Cut-off 50%) |      |              | Nontumoral pDCs/Peritumor stromal pDCs (Cut-off 50%) |      |        |
|-----------------------------|----------|--------------------------------------------------------|------|--------------|------------------------------------------------------|------|--------|
|                             |          | Low                                                    | High | P            | Low                                                  | High | P      |
| Age(year)                   | ≤50      | 47                                                     | 48   | 0.984        | 47                                                   | 48   | 0.892  |
|                             | >50      | 64                                                     | 65   |              | 65                                                   | 64   |        |
| Sex                         | Female   | 15                                                     | 10   | 0.268        | 9                                                    | 16   | 0.137  |
|                             | Male     | 96                                                     | 103  |              | 103                                                  | 96   |        |
| HBsAg                       | Negative | 26                                                     | 16   | 0.076        | 22                                                   | 20   | 0.732  |
|                             | Positive | 85                                                     | 97   |              | 90                                                   | 92   |        |
| HCV                         | Negative | 109                                                    | 113  | †0.244       | 110                                                  | 112  | †0.498 |
|                             | Positive | 2                                                      | 0    |              | 2                                                    | 0    |        |
| AFP (ng/ml)                 | ≤20      | 44                                                     | 47   | 0.766        | 43                                                   | 48   | 0.496  |
|                             | >20      | 67                                                     | 66   |              | 69                                                   | 64   |        |
| GGT (U/L)                   | ≤54      | 42                                                     | 41   | 0.810        | 44                                                   | 39   | 0.489  |
|                             | >54      | 69                                                     | 72   |              | 68                                                   | 73   |        |
| Liver cirrhosis             | No       | 17                                                     | 13   | 0.402        | 15                                                   | 15   | 1.000  |
|                             | yes      | 94                                                     | 100  |              | 97                                                   | 97   |        |
| Tumor size(cm)              | ≤5       | 50                                                     | 53   | 0.780        | 52                                                   | 51   | 0.893  |
|                             | >5       | 61                                                     | 60   |              | 60                                                   | 61   |        |
| Tumor number                | Single   | 97                                                     | 95   | 0.478        | 96                                                   | 96   | 1.000  |
|                             | Multiple | 14                                                     | 18   |              | 16                                                   | 16   |        |
| Vascular invasion           | absence  | 76                                                     | 68   | 0.195        | 70                                                   | 74   | 0.577  |
|                             | present  | 35                                                     | 45   |              | 42                                                   | 38   |        |
| Tumor encapsulation         | complete | 55                                                     | 48   | 0.288        | 52                                                   | 51   | 0.893  |
|                             | none     | 56                                                     | 65   |              | 60                                                   | 61   |        |
| Tumor differentiation       | I+II     | 79                                                     | 73   | 0.293        | 72                                                   | 80   | 0.252  |
|                             | III+IV   | 32                                                     | 40   |              | 40                                                   | 32   |        |
| TNM stage                   | I        | 69                                                     | 55   | <b>0.042</b> | 61                                                   | 63   | 0.788  |
|                             | II+III   | 42                                                     | 58   |              | 51                                                   | 49   |        |

Abbreviations: AFP, alpha-fetoprotein; GGT, gamma glutamyl transferase; TNM, tumor-node-metastasis.

†Fisher's exact tests; Chi-square tests for all the other analyses.

**Supplementary Table 4. Descriptive statistics of immunohistochemical variables of intratumoral lymphocytes in HCC and correlations with pDCs (cohort 1, n=224)**

| Variable*   | Mean  | SE    | Range  | Correlations with pDCs# |
|-------------|-------|-------|--------|-------------------------|
| CD3+        | 298.7 | 23.96 | 7-1779 | r=0.078, p=0.217        |
| CD4+        | 119.6 | 9.57  | 4-712  | r=0.126, p=0.098        |
| CD8+        | 108.1 | 8.85  | 5-636  | r=0.025, p=0.537        |
| Granzyme B+ | 33.98 | 3.42  | 0-256  | r=0.092, p=0.188        |

\* Number of lymphocytes per mm<sup>2</sup>.

# Correlations of pDCs with intratumoral lymphocytes were tested using Spearman's rho coefficients tests

**Supplementary Table 5. Correlation between intratumoral Treg cells or IL-17<sup>+</sup> cells of whole tumor sections and clinicopathologic characteristics in HCC (cohort 1, n=224)**

| Clinicopathological indexes |          | Intratumoral Treg cells<br>(Cut-off 50%) |      |              | Intratumoral IL-17 <sup>+</sup> cells<br>(Cut-off 50%) |      |              |
|-----------------------------|----------|------------------------------------------|------|--------------|--------------------------------------------------------|------|--------------|
|                             |          | Low                                      | High | P            | Low                                                    | High | P            |
| Age(year)                   | ≤50      | 50                                       | 45   | 0.740        | 43                                                     | 52   | 0.383        |
|                             | >50      | 65                                       | 64   |              | 66                                                     | 63   |              |
| Sex                         | Female   | 14                                       | 11   | 0.621        | 11                                                     | 14   | 0.621        |
|                             | Male     | 101                                      | 98   |              | 98                                                     | 101  |              |
| HBsAg                       | Negative | 26                                       | 16   | 0.129        | 22                                                     | 20   | 0.593        |
|                             | Positive | 89                                       | 93   |              | 87                                                     | 95   |              |
| HCV                         | Negative | 113                                      | 109  | †0.498       | 108                                                    | 114  | †1.000       |
|                             | Positive | 2                                        | 0    |              | 1                                                      | 1    |              |
| AFP (ng/ml)                 | ≤20      | 46                                       | 45   | 0.845        | 51                                                     | 40   | 0.067        |
|                             | >20      | 69                                       | 64   |              | 58                                                     | 75   |              |
| GGT (U/L)                   | ≤54      | 45                                       | 38   | 0.509        | 47                                                     | 36   | 0.067        |
|                             | >54      | 70                                       | 71   |              | 62                                                     | 79   |              |
| Liver cirrhosis             | No       | 16                                       | 14   | 0.814        | 18                                                     | 12   | 0.182        |
|                             | yes      | 99                                       | 95   |              | 91                                                     | 103  |              |
| Tumor size(cm)              | ≤5       | 54                                       | 49   | 0.764        | 58                                                     | 45   | <b>0.035</b> |
|                             | >5       | 61                                       | 60   |              | 51                                                     | 70   |              |
| Tumor number                | Single   | 95                                       | 97   | 0.172        | 94                                                     | 98   | 0.827        |
|                             | Multiple | 20                                       | 12   |              | 15                                                     | 17   |              |
| Vascular invasion           | absence  | 81                                       | 63   | <b>0.049</b> | 79                                                     | 65   | <b>0.013</b> |
|                             | present  | 34                                       | 46   |              | 30                                                     | 50   |              |
| Tumor encapsulation         | complete | 65                                       | 48   | 0.570        | 56                                                     | 47   | 0.115        |
|                             | none     | 60                                       | 61   |              | 53                                                     | 68   |              |
| Tumor differentiation       | I+II     | 84                                       | 68   | 0.088        | 76                                                     | 76   | 0.560        |
|                             | III+IV   | 31                                       | 41   |              | 33                                                     | 39   |              |
| TNM stage                   | I        | 69                                       | 55   | 0.151        | 69                                                     | 55   | <b>0.020</b> |
|                             | II+III   | 46                                       | 54   |              | 40                                                     | 60   |              |

Abbreviations: AFP, alpha-fetoprotein; GGT, gamma glutamyl transferase; TNM, tumor-node-metastasis.

†Fisher's exact tests; Chi-square tests for all the other analyses.

**Supplementary Table 6. Univariate and multivariate analyses of prognostic factors in TMA of HCC**

**(cohort 2, n=380)**

| Variable                                                            | TTR                |             | OS                 |             |
|---------------------------------------------------------------------|--------------------|-------------|--------------------|-------------|
|                                                                     | HR(95%CI)          | P           | HR(95%CI)          | P           |
| <b>Univariate analysis</b>                                          |                    |             |                    |             |
| Age, year (≤50 versus >50)                                          | 1.229(0.934-1.615) | .140        | 1.036(0.768-1.398) | .817        |
| Sex (female versus male)                                            | 1.387(0.954-2.016) | .087        | 1.093(0.735-1.625) | .662        |
| HBsAg (negative versus positive)                                    | 1.387(0.921-2.087) | .117        | 1.172(0.757-1.814) | .478        |
| AFP,ng/ml (≤20 versus>20)                                           | 1.302(0.991-1.710) | .058        | 1.607(1.175-2.199) | <b>.003</b> |
| GGT,U/L (≤54 versus>54)                                             | 1.698(1.305-2.210) | <b>.000</b> | 1.853(1.378-2.492) | <b>.000</b> |
| Liver cirrhosis (no versus yes)                                     | 1.647(1.101-2.463) | <b>.015</b> | 1.466(0.939-2.290) | .092        |
| Tumor size,cm(≤5 versus>5)                                          | 1.572(1.208-2.045) | <b>.001</b> | 2.000(1.495-2.676) | <b>.000</b> |
| Tumor number (single versus multiple)                               | 1.695(1.170-2.456) | <b>.005</b> | 1.825(1.233-2.702) | <b>.003</b> |
| Vascular invasion (no versus yes)                                   | 1.767(1.349-2.313) | <b>.000</b> | 1.855(1.378-2.496) | <b>.000</b> |
| Tumor encapsulation (complete vs none)                              | 1.312(1.011-1.704) | <b>.041</b> | 1.300(0.972-1.739) | .077        |
| Tumor differentiation (I+II versus III+IV)                          | 1.443(1.078-1.931) | <b>.014</b> | 1.746(1.278-2.386) | <b>.000</b> |
| TNM stage (I versus II III)                                         | 1.739(1.337-2.262) | <b>.000</b> | 2.017(1.508-2.699) | <b>.000</b> |
| Intra- pDCs (low versus high)                                       | 1.797(1.375-2.348) | <b>.000</b> | 2.005(1.485-2.707) | <b>.000</b> |
| Intra- pDCs and IL-17+ cells<br>(both low versus both high)         | 2.013(1.476-2.744) | <b>.000</b> | 2.318(1.633-3.291) | <b>.000</b> |
| Intra- pDCs and Treg cells<br>(both low versus both high)           | 2.178(1.597-2.969) | <b>.000</b> | 2.466(1.734-3.505) | <b>.000</b> |
| Intra- pDCs and IL-17+, and Treg cells<br>(all low versus all high) | 2.407(1.721-3.367) | <b>.000</b> | 2.832(1.932-4.151) | <b>.000</b> |
| <b>Multivariate analysis</b>                                        |                    |             |                    |             |
| AFP,ng/ml (≤20 versus>20)                                           | NA                 | NA          | 1.343(0.969-1.861) | .077        |
| GGT,U/L (≤54 versus>54)                                             | 1.577(1.205-2.063) | <b>.001</b> | 1.689(1.247-2.288) | <b>.001</b> |
| Liver cirrhosis (no versus yes)                                     | 1.455(0.964-2.197) | .074        | NA                 | NA          |
| Tumor size,cm(≤5 versus>5)                                          | 1.288(0.977-1.700) | .073        | 1.604(1.186-2.170) | <b>.002</b> |
| Tumor number (single versus multiple)                               | 1.457(0.995-2.132) | .053        | 1.593(1.064-2.386) | <b>.024</b> |
| Vascular invasion (no versus yes)                                   | 1.410(1.060-1.876) | <b>.018</b> | 1.283(0.937-1.758) | .121        |
| Tumor encapsulation (complete vs none)                              | 1.199(0.917-1.569) | .185        | NA                 | NA          |
| Tumor differentiation (I+II versus III+IV)                          | 1.408(1.067-1.937) | <b>.017</b> | 1.658(1.198-2.294) | <b>.002</b> |
| Intra- pDCs (low versus high)                                       | 1.541(1.165-2.038) | <b>.002</b> | 1.799(1.315-2.460) | <b>.000</b> |
| Intra- pDCs and IL-17+ cells<br>(both low versus both high)         | 1.655(1.194-2.292) | <b>.002</b> | 1.913(1.326-2.760) | <b>.001</b> |
| Intra- pDCs and Treg cells<br>(both low versus both high)           | 1.721(1.238-2.393) | <b>.001</b> | 2.096(1.453-3.024) | <b>.000</b> |
| Intra- pDCs and IL-17+, and Treg cells<br>(all low versus all high) | 1.867(1.305-2.671) | <b>.000</b> | 2.219(1.484-3.317) | <b>.000</b> |

NOTE: Cox proportional hazards regression model. Abbreviations: AFP, alpha-fetoprotein; GGT, gamma glutamyl transferase; TNM, tumor-node-metastasis. HR, hazard ratio; CI, confidential interval.

**Supplementary Table 7. Univariate and multivariate analyses of prognostic factors in TMA of HCC****(cohort 3, n=461)**

| Variable                                                            | TTR                |             | OS                 |             |
|---------------------------------------------------------------------|--------------------|-------------|--------------------|-------------|
|                                                                     | HR(95%CI)          | P           | HR(95%CI)          | P           |
| <b>Univariate analysis</b>                                          |                    |             |                    |             |
| Age, year (≤50 versus >50)                                          | 0.981(0.783-1.229) | .869        | 1.042(0.815-1.332) | .741        |
| Sex (female versus male)                                            | 1.011(0.739-1.384) | .945        | 1.024(0.728-1.441) | .890        |
| HBsAg (negative versus positive)                                    | 1.347(0.947-1.917) | .097        | 1.100(0.767-1.578) | .606        |
| AFP,ng/ml (≤20 versus>20)                                           | 1.646(1.285-2.109) | <b>.000</b> | 1.505(1.152-1.967) | <b>.003</b> |
| GGT,U/L (≤54 versus>54)                                             | 1.928(1.525-2.438) | <b>.000</b> | 2.148(1.657-2.784) | <b>.000</b> |
| Liver cirrhosis (no versus yes)                                     | 1.344(0.970-1.862) | .076        | 1.382(0.964-1.983) | .079        |
| Tumor size,cm(≤5 versus>5)                                          | 1.802(1.434-2.264) | <b>.000</b> | 1.976(1.538-2.539) | <b>.000</b> |
| Tumor number (single versus multiple)                               | 1.623(1.206-2.185) | <b>.001</b> | 1.547(1.124-2.131) | <b>.007</b> |
| Vascular invasion (no versus yes)                                   | 2.148(1.711-2.695) | <b>.000</b> | 2.572(2.007-3.295) | <b>.000</b> |
| Tumor encapsulation (complete vs none)                              | 1.503(1.199-1.883) | <b>.000</b> | 1.695(1.326-2.167) | <b>.000</b> |
| Tumor differentiation (I+II versus III+IV)                          | 1.506(1.192-1.902) | <b>.001</b> | 1.568(1.218-2.019) | <b>.000</b> |
| TNM stage (I versus II III)                                         | 2.179(1.732-2.742) | <b>.000</b> | 2.489(1.932-3.206) | <b>.000</b> |
| Intra- pDCs (low versus high)                                       | 1.705(1.357-2.142) | <b>.000</b> | 1.837(1.430-2.360) | <b>.000</b> |
| Intra- pDCs and IL-17+ cells<br>(both low versus both high)         | 1.826(1.407-2.371) | <b>.000</b> | 2.030(1.523-2.706) | <b>.000</b> |
| Intra- pDCs and Treg cells<br>(both low versus both high)           | 1.851(1.431-2.396) | <b>.000</b> | 2.132(1.603-2.836) | <b>.000</b> |
| Intra- pDCs and IL-17+, and Treg cells<br>(all low versus all high) | 1.985(1.497-2.663) | <b>.000</b> | 2.424(1.770-3.319) | <b>.000</b> |
| <b>Multivariate analysis</b>                                        |                    |             |                    |             |
| AFP,ng/ml (≤20 versus>20)                                           | 1.351(1.045-1.747) | <b>.022</b> | 1.198(0.910-1.578) | .198        |
| GGT,U/L (≤54 versus>54)                                             | 1.830(1.434-2.336) | <b>.000</b> | 1.979(1.511-2.593) | <b>.000</b> |
| Tumor size,cm(≤5 versus>5)                                          | 1.297(1.019-1.651) | <b>.034</b> | 1.428(1.099-1.855) | <b>.008</b> |
| Tumor number (single versus multiple)                               | 1.561(1.156-2.107) | <b>.004</b> | 1.542(1.115-2.133) | <b>.009</b> |
| Vascular invasion (no versus yes)                                   | 1.578(1.241-2.008) | <b>.000</b> | 1.894(1.462-2.455) | <b>.000</b> |
| Tumor encapsulation (complete vs none)                              | 1.282(1.017-1.616) | <b>.035</b> | 1.461(1.138-1.877) | <b>.003</b> |
| Tumor differentiation (I+II versus III+IV)                          | 1.174(0.923-1.492) | .192        | 1.191(0.919-1.543) | .187        |
| Intra- pDCs (low versus high)                                       | 1.497(1.180-1.899) | <b>.000</b> | 1.645(1.267-2.134) | <b>.000</b> |
| Intra- pDCs and IL-17+ cells<br>(both low versus both high)         | 1.562(1.186-2.058) | <b>.000</b> | 1.783(1.318-2.412) | <b>.000</b> |
| Intra- pDCs and Treg cells<br>(both low versus both high)           | 1.602(1.220-2.104) | <b>.000</b> | 1.927(1.425-2.605) | <b>.000</b> |
| Intra- pDCs and IL-17+, and Treg cells<br>(all low versus all high) | 1.685(1.250-2.273) | <b>.000</b> | 2.190(1.571-3.052) | <b>.000</b> |

NOTE: Cox proportional hazards regression model.

Abbreviations: AFP, alpha-fetoprotein; GGT, gamma glutamyl transferase; TNM, tumor-node-metastasis.

HR, hazard ratio; CI, confidential interval.

**A****BDCA2**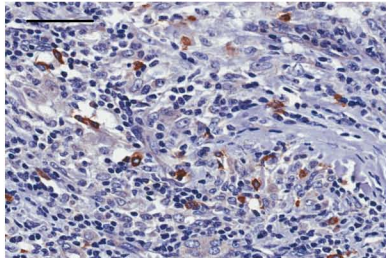**B****Negative controls**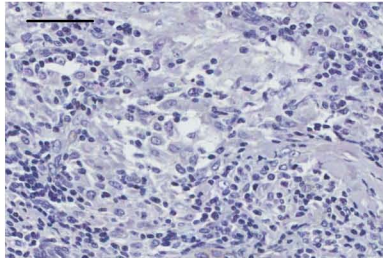**C****Rabbit IgG**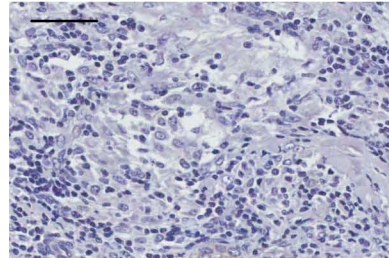

**Supplementary Figure 1. Immunohistochemistry staining showed (A) BDCA2, (B) Negative controls, and (C) Rabbit IgG. Scale bar=50 $\mu$ m.**



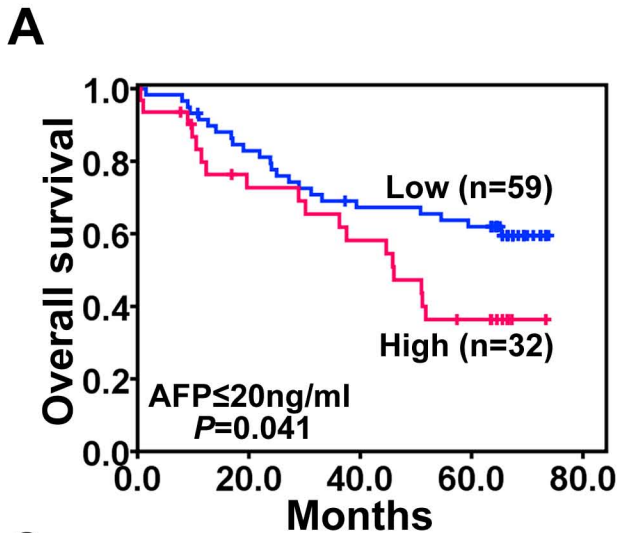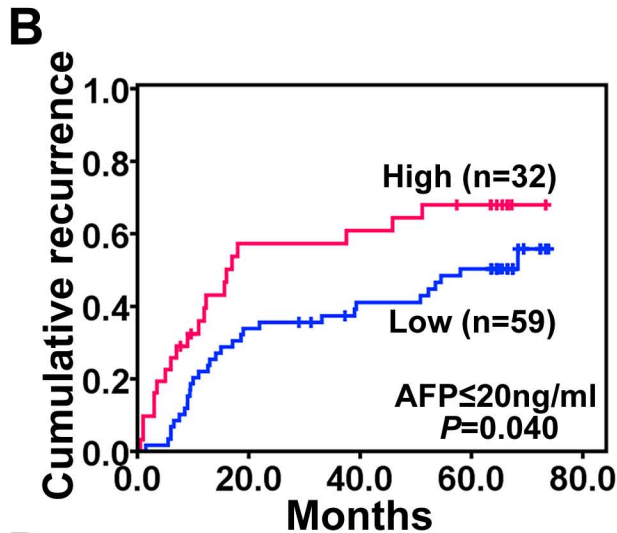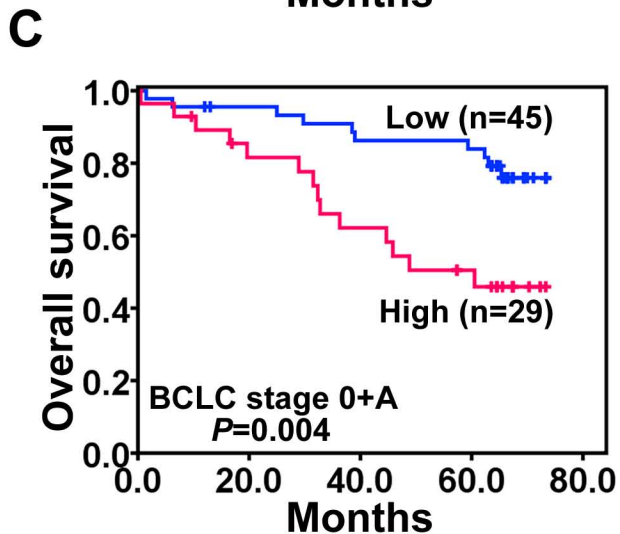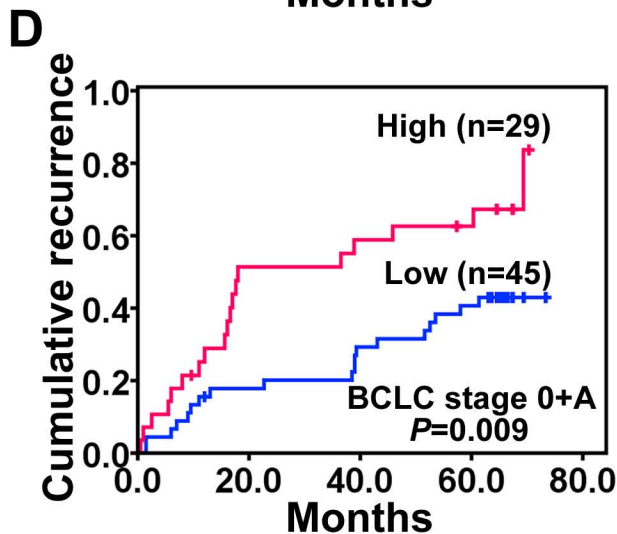

**Supplementary Figure 2. Kaplan–Meier analysis of intratumoral BDCA2+ pDCs in subgroups of HCC patients. The prognostic value of pDCs was significant in (A-B) the AFP  $\leq$  20 ng/mL and (C-D) BCLC stage 0+A.**

DAPI

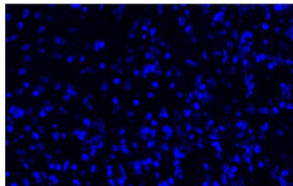

CD123

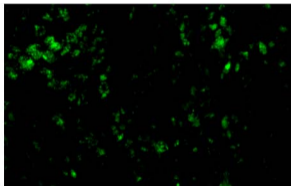

CD303

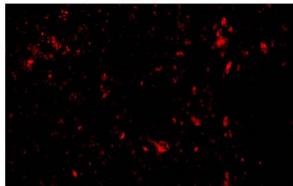

Merge

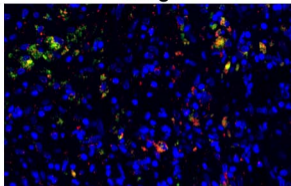

**Supplementary Figure 3. Fluorescence microscopy showed colocalization of BDCA2 and CD123 expression on cell surface.**

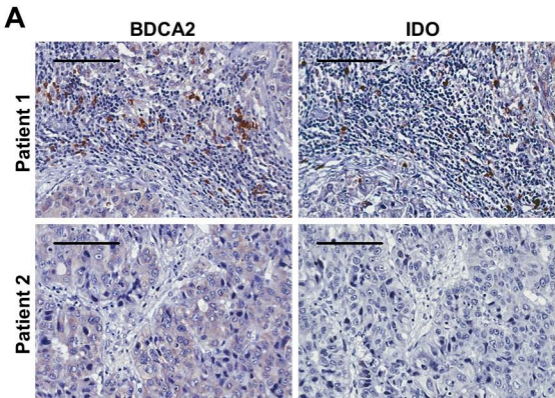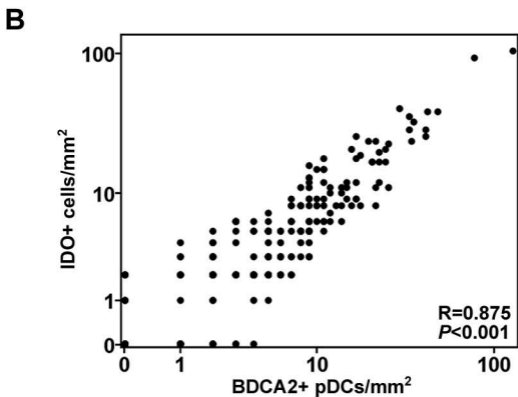

Supplementary Figure 4. High infiltration of intratumoral pDCs is associated with increased IDO+ cells. (A) High infiltration of intratumoral pDCs and IDO+ cells, and low infiltration of intratumoral pDCs and IDO+ cells. Scale bar=100 $\mu$ m. (C) Association between intratumoral pDCs and IDO+ cells.
